# Supplementary material for: Efficient white light-emitting polymers from dual thermally activated delayed fluorescence chromophores for non-doped solution processed white electroluminescent devices
Source: Royal Society of Chemistry journal article supplement (doi:10.1039/d0py01541e), 2021-01-01

## Supporting Information

### Efficient white light-emitting polymers from dual thermally activated delayed fluorescence chromophores for non-doped solution processed white electroluminescent devices

Praetip Khammultri,<sup>a</sup> Wipaporn Kitisriworaphan,<sup>b</sup> Pongsakorn Chasing,<sup>a</sup> Supawadee Namuangruk,<sup>c</sup> Taweesak Sudyoadsuk,<sup>a</sup> and Vinich Promarak<sup>\*ad</sup>

<sup>a</sup> Department of Materials Science and Engineering, School of Molecular Science and Engineering, Vidyasirimedhi Institute of Science and Technology, Wangchan, Rayong 21210, Thailand.

E-mail: vinich.p@vistec.ac.th

<sup>b</sup> School of Chemistry, Institute of Science, Suranaree University of Technology, Nakhon Ratchasima 30000, Thailand.

<sup>c</sup> National Nanotechnology Center (NANOTEC), National Science and Technology Development Agency, Pathum Thani 12120, Thailand

<sup>d</sup> Research Network of NANOTEC-VISTEC on Nanotechnology for Energy, Vidyasirimedhi Institute of Science and Technology, Wangchan, Rayong 21210, Thailand.

---

#### Materials synthesis and characterizations

2-Bromo-9H-thioxanthen-9-one 10,10-dioxide (**1**) was synthesized according to the following reference.<sup>1</sup>

2-(4-(Diphenylamino)phenyl)-9H-thioxanthen-9-one-10,10-dioxide (**2**): Compound (**4**) (0.20 g, 0.63 mmol), 4-(diphenylamino)phenylboronic acid (0.20 g, 0.69 mmol) and 2 M Na<sub>2</sub>CO<sub>3</sub> (3 ml) were mixed in 2-neck round bottom flask 100 ml. THF (30 ml) was poured in the mixture followed by degassing under N<sub>2</sub> for 5 minutes. Tetrakis(triphenylphosphine)palladium(0) (Pd(PPh<sub>3</sub>)<sub>4</sub>) (0.036 g, 0.031 mmol) was added following degassing under N<sub>2</sub> for 5 minutes. The mixture was refluxed under N<sub>2</sub> for 24 h. After cooling to room temperature, water (50 ml) was added to the solution and extracted by CH<sub>2</sub>Cl<sub>2</sub> (50 ml x 3). The combined organic phase was washed in water (50 ml), brine solution (50 ml) and dried over with anhydrous Na<sub>2</sub>SO<sub>4</sub>. The solvent was evaporated until drying out. The crude product was purified by column chromatography eluting with a mixture of CH<sub>2</sub>Cl<sub>2</sub> and hexane (1:1) followed by recrystallization with a mixture of CH<sub>2</sub>Cl<sub>2</sub> and hexane to afford red orange solids (0.26 g, 85%). <sup>1</sup>H NMR (600 MHz, CDCl<sub>3</sub>) δ = 8.51 (d, J = 1.6 Hz, 1H), 8.36 (dd, J = 7.9, 1.5 Hz, 1H), 8.20 (d, J = 8.1 Hz, 2H), 8.03 (dd, J = 8.2, 1.5 Hz, 1H), 7.88 (t, J = 7.6 Hz, 1H), 7.79 (t, J = 7.7 Hz, 1H), 7.55 (d, J = 8.1 Hz, 2H), 7.31 (t, J = 7.5 Hz, 4H), 7.16 (d, J = 8.0 Hz, 6H), 7.09 (t, J = 7.3 Hz, 2H) ppm. <sup>13</sup>C NMR (150 MHz, CDCl<sub>3</sub>) δ = 178.75, 149.22, 147.30, 145.94, 141.36, 138.48, 134.77, 133.28, 132.10, 131.27, 131.05, 130.02, 129.63, 129.35, 128.16, 126.80,

125.26, 124.41, 123.92, 123.65, 122.95 ppm. HRMS MADI-TOF ( $m/z$ ) calcd for  $C_{31}H_{21}NO_3S$ : 487.1242; found 488.2588 (MH<sup>+</sup>).

*2-(4-(Bis(4-bromophenyl)amino)phenyl)-9H-thioxanthen-9-one-10,10-dioxide (M1)*: Compound **(5)** (0.30 g, 0.62 mmol) was dissolved in chloroform at room temperature. Then, the mixture was moved to ice bath. *N*-Bromosuccinimide (NBS) (0.23 g, 1.30 mmol) was dissolved in  $CH_2Cl_2$  and slowly added by dropwise at 0°C. After completed, the reaction was plugged off silica eluting with  $CH_2Cl_2$ . The solvent was removed until dry out. The crude product was purified by recrystallization with a mixture of  $CH_2Cl_2$  and hexane to afford yellow solids (0.21 g, 81 %). <sup>1</sup>H NMR (600 MHz,  $CDCl_3$ )  $\delta$  = 8.51 (d,  $J$  = 1.8 Hz, 1H), 8.37 (dd,  $J$  = 7.9, 1.2 Hz, 1H), 8.21 (t,  $J$  = 8.3 Hz, 2H), 8.03 (dd,  $J$  = 8.2, 1.9 Hz, 1H), 7.89 (t,  $J$  = 7.6 Hz, 1H), 7.80 (t,  $J$  = 7.7 Hz, 1H), 7.57 (d,  $J$  = 8.5 Hz, 2H), 7.41 (d,  $J$  = 8.6 Hz, 4H), 7.15 (d,  $J$  = 8.4 Hz, 2H), 7.01 (d,  $J$  = 8.7 Hz, 4H) ppm. <sup>13</sup>C NMR (150 MHz,  $CDCl_3$ )  $\delta$  = 178.69, 148.20, 146.07, 145.63, 141.32, 138.88, 134.85, 133.34, 132.80, 132.43, 132.27, 131.31, 130.96, 129.37, 128.49, 126.97, 126.38, 124.48, 123.77, 123.69, 116.75 ppm. HRMS APCI-QTOF ( $m/z$ ) calcd for  $C_{31}H_{19}Br_2NO_3S$ : 644.9432; found 645.8822 (MH<sup>+</sup>).

*3,6-Di-tert-butyl-9-(4-((4-fluorophenyl)sulfonyl)phenyl)-9H-carbazole (4)*: A suspension of 3,6-di-*tert*-butyl-carbazole (1.12 g, 4.0 mmol) and 60% sodium hydride (0.48 g, 12.0 mmol) in dimethylformamide (100 ml) was stirred under nitrogen atmosphere at room temperature for 30 min. Under vigorous stirring, bis(4-fluorophenyl)sulfone **(3)** (4.06 g, 16.0 mmol) was added. The mixture was stirred at room temperature for 2 hours. After that the reaction was quenched with water and dichloromethane (50 ml) was added. The organic phase was washed with water (50 ml x 2) and brine solution (50 ml), dried over anhydrous  $Na_2SO_4$  and filtered. The solvent was removed to dryness, and the residue was purified by silica gel column chromatography ( $SiO_2$ ,  $CH_2Cl_2$ /hexane) followed by recrystallization with a mixture of dichloromethane and methanol to afford the product as white solids (1.58 g, 77%); <sup>1</sup>H-NMR (600 MHz,  $CDCl_3$ )  $\delta$  = 8.24 (d, 2H,  $J$  = 8.4 Hz) 8.13 (m, 4H), 8.06 (m, 1H), 7.81 (d, 2H,  $J$  = 8.4 Hz), 7.75 (d, 1H,  $J$  = 8.4 Hz), 7.46 (m, 3H), 7.39 (d, 1H,  $J$  = 8.6 Hz), 1.46 (s, 18H) ppm; <sup>13</sup>C-NMR (150 MHz,  $CDCl_3$ )  $\delta$  = 144.1, 138.7, 138.3, 138.2, 129.6, 129.4, 126.6, 126.5, 124.1, 123.9, 116.5, 109.2, 109.1, 34.8, 31.9 ppm. HRMS MALDI-TOF ( $m/z$ ) calcd for  $C_{32}H_{32}FNO_2S$ : 513.2138; found 513.4738 (M<sup>+</sup>).

*2,7-Dibromo-9-(4-((4-(3,6-di-*tert*-butyl-9H-carbazol-9-yl)phenyl)sulfonyl)phenyl)-9H-carbazole (M2)*: A suspension of 2,7-dibromo-9H-carbazole (0.48 g, 1.5 mmol) and 60% sodium hydride (0.12 g, 3.0 mmol) in dimethylformamide (50 ml) was heated at 70 °C under nitrogen atmosphere. At this temperature and under vigorous stirring, compound **4** (0.51 g, 1.0 mmol) was added. The mixture was stirred at 70 °C for 24 hours. After cooling to room temperature, the reaction was quenched with water and dichloromethane (50 ml) was added. The organic phase was washed with water (50 ml x 2) and brine solution (50 ml), dried

over anhydrous  $\text{Na}_2\text{SO}_4$  and filtered. The solvent was removed to dryness, and the residue was purified by silica gel column chromatography ( $\text{SiO}_2$ ,  $\text{CH}_2\text{Cl}_2/\text{hexane}$ ) followed by recrystallization with a mixture of dichloromethane and methanol to afford white solids (0.67 g, 94%);  $^1\text{H-NMR}$  (600 MHz,  $\text{CDCl}_3$ )  $\delta$  = 8.31 (d, 2H,  $J$  = 8.7 Hz), 8.26 (d, 2H,  $J$  = 8.7 Hz), 8.13 (s, 2H), 7.94 (d, 2H,  $J$  = 8.3 Hz), 7.84 (d, 2H,  $J$  = 8.5 Hz), 7.75 (d, 2H,  $J$  = 8.5 Hz), 7.55 (dd, 2H), 7.44-7.47 (m, 5H), 1.46 (s, 18H) ppm;  $^{13}\text{C-NMR}$  (150 MHz,  $\text{CDCl}_3$ )  $\delta$  = 144.2, 143.5, 141.3, 141.0, 140.9, 138.2, 130.0, 129.8, 127.4, 126.6, 124.6, 124.3, 124.2, 124.0, 122.3, 121.9, 121.7, 120.4, 116.5, 112.9, 112.6, 109.2, 34.8, 31.9 ppm; HRMS APCI-QTOF ( $m/z$ ) calcd for  $\text{C}_{44}\text{H}_{38}\text{Br}_2\text{N}_2\text{O}_2\text{S}$ : 816.1021; found 817.0843 (MH<sup>+</sup>).

## References

<sup>1</sup> Wang, H.; Xie, L.; Peng, Q.; Meng, L.; Wang, Y.; Yi, Y.; Wang, P., Novel thermally activated delayed fluorescence materials-thioxanthone derivatives and their applications for highly efficient OLEDs. *Adv Mater* 2014, 26 (30), 5198-204.

## Additional Characterization data

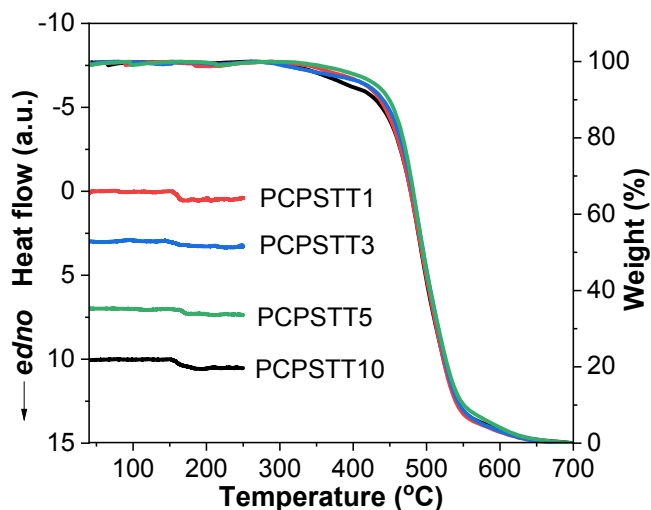

**Fig. S1** TGA and DSC thermograms of PCPSTTx measured  $\text{N}_2$  flow at heating rate of  $10\text{ }^\circ\text{C min}^{-1}$ .

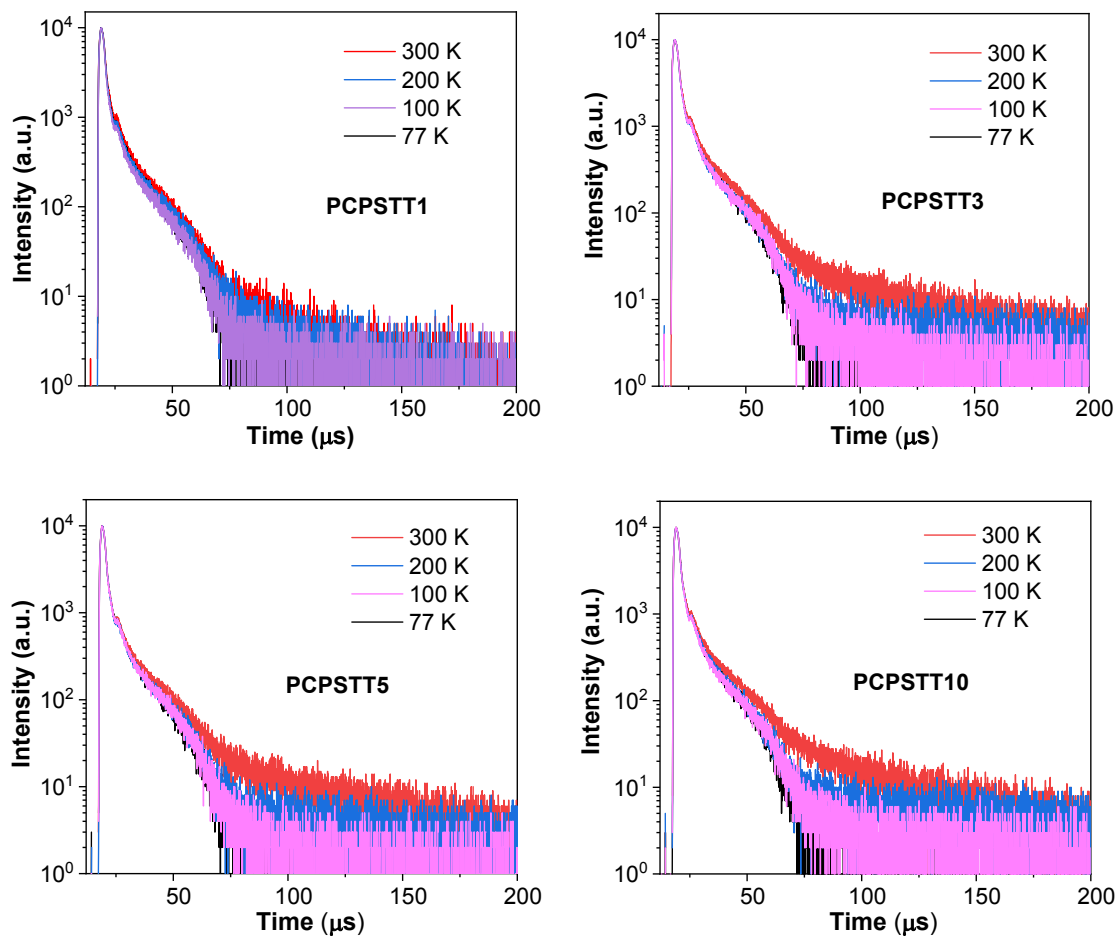

**Fig. S2** The temperature-dependent transient PL decays of 1wt% doped in Zeonex films of PCPSTTx measured at 77 to 300 K.

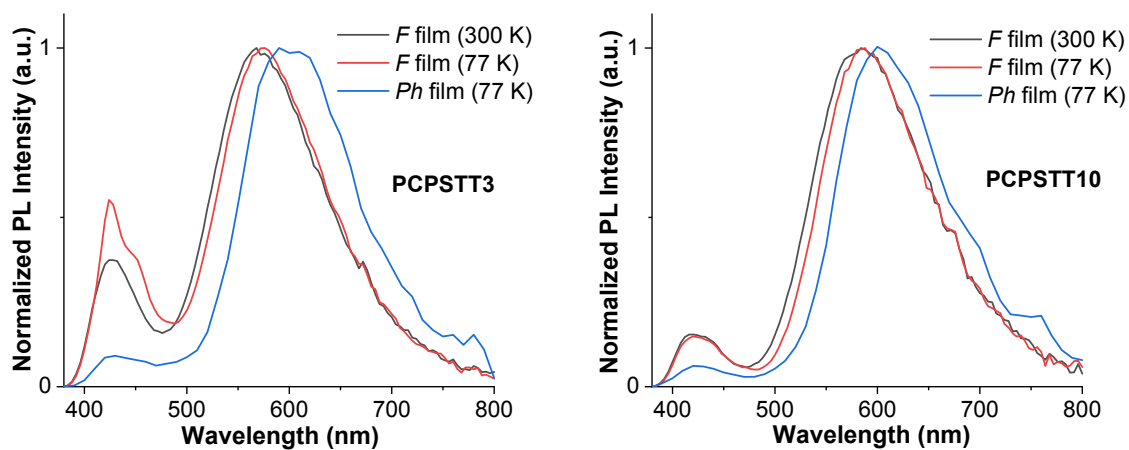

**Fig. S3** The fluorescence (*F*) and phosphorescence (*Ph*) spectra of PCPSTT3 and PCPSTT10 at 1wt% doped in Zeonex films measured at 300 K and 77 K, respectively.

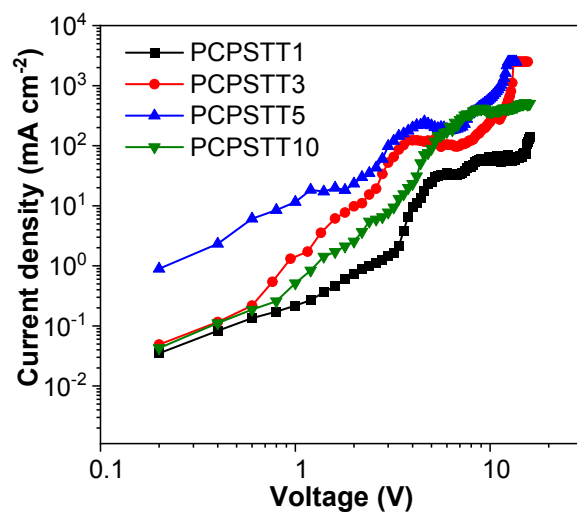

**Fig. S4** Current density-voltage (J-V) plots of the electron only devices (ITO/PEDOT:PSS (35 nm)/Al (50 nm)/PCPSTTx (130 nm)/TmPyPB (10 nm)/Li (0.5 nm)/Al (80 nm)).

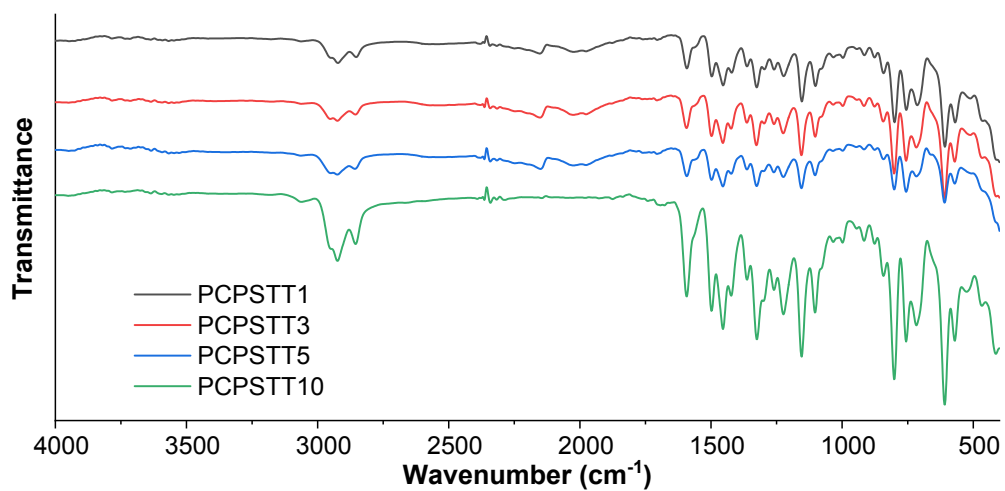

**Fig. S5** FTIR spectra.

Fig. S6 Copies of  $^1\text{H}$  and  $^{13}\text{C}$ -NMR spectra.

Compound 2

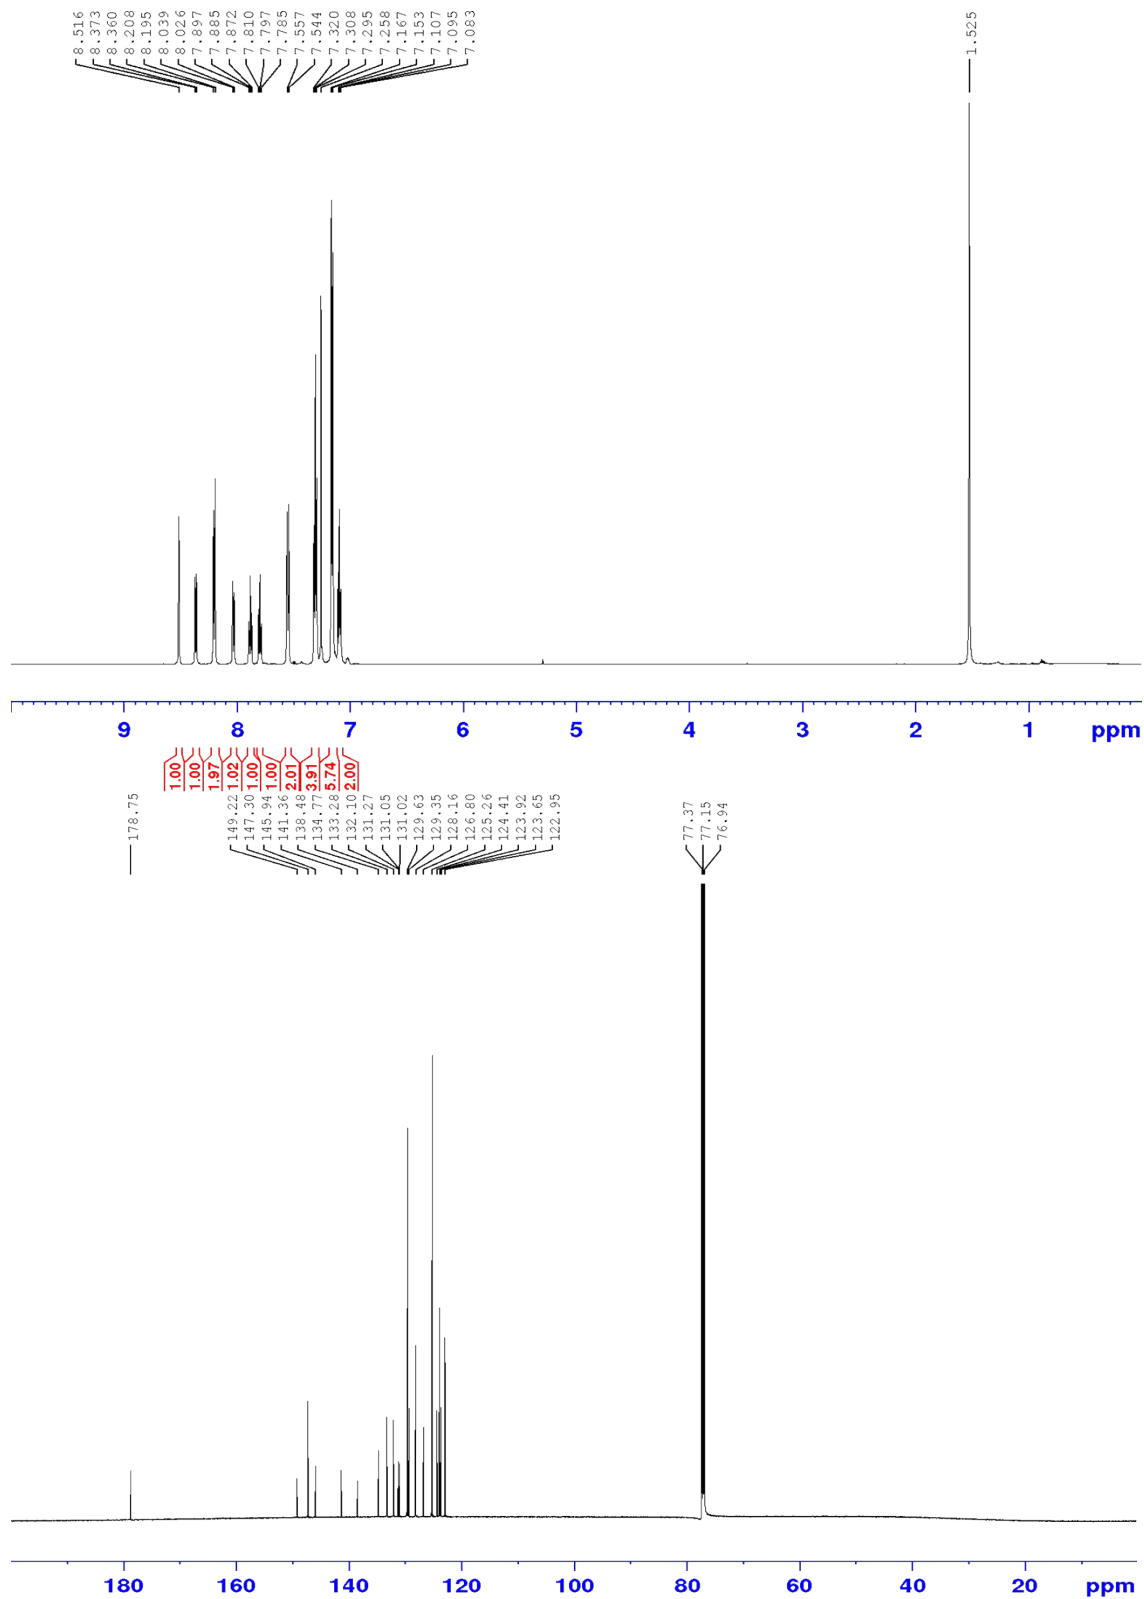

# Compound M1

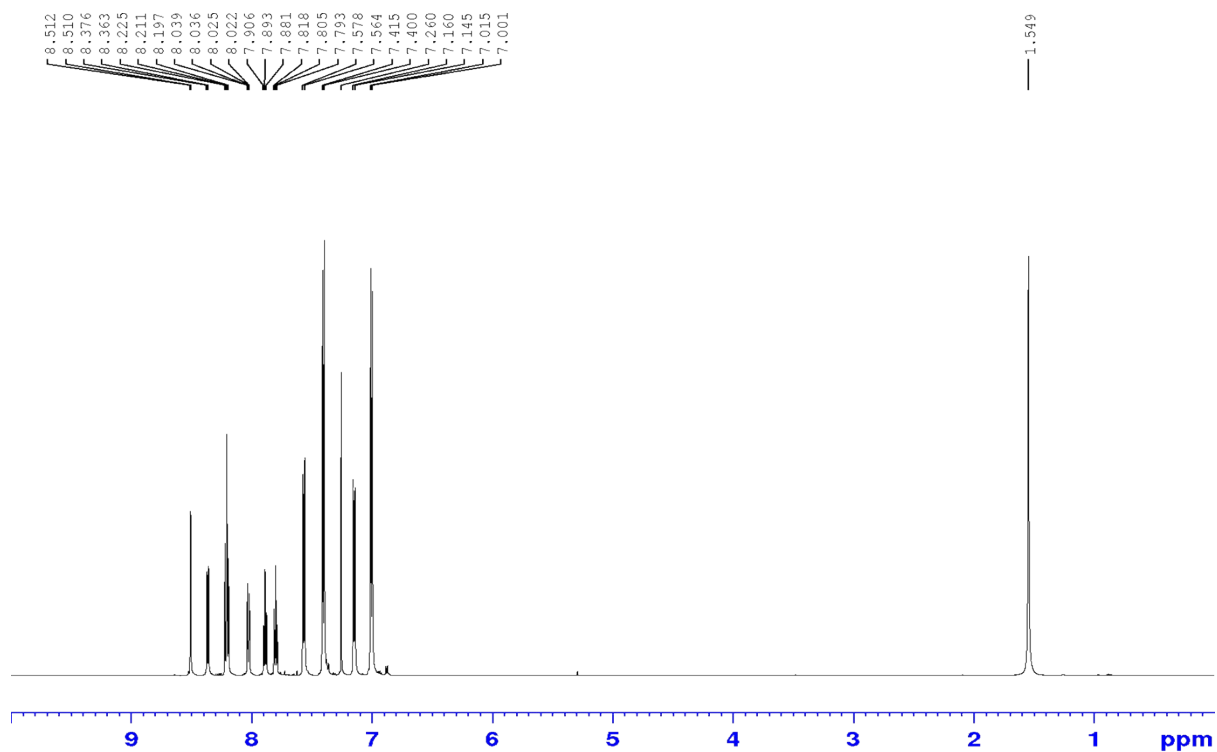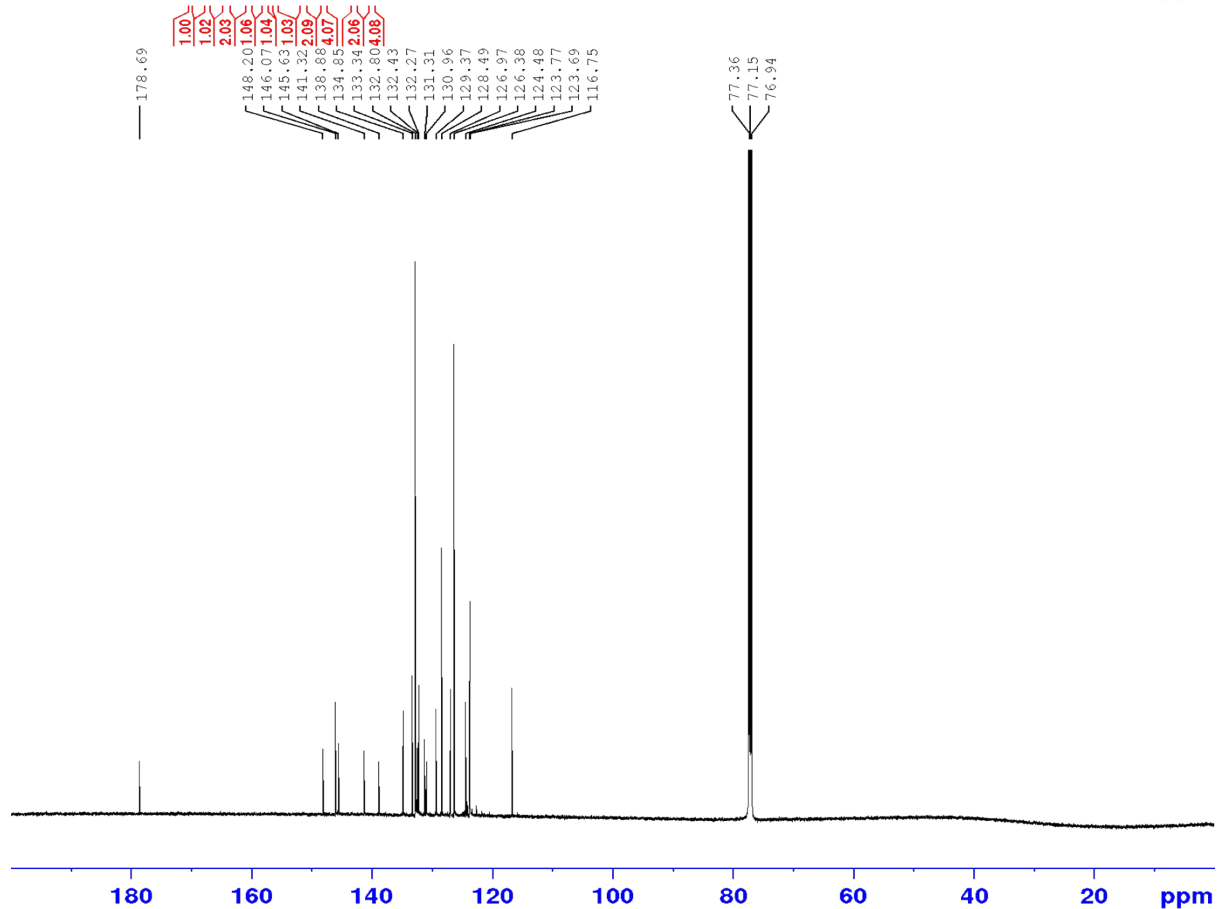

# Compound 4

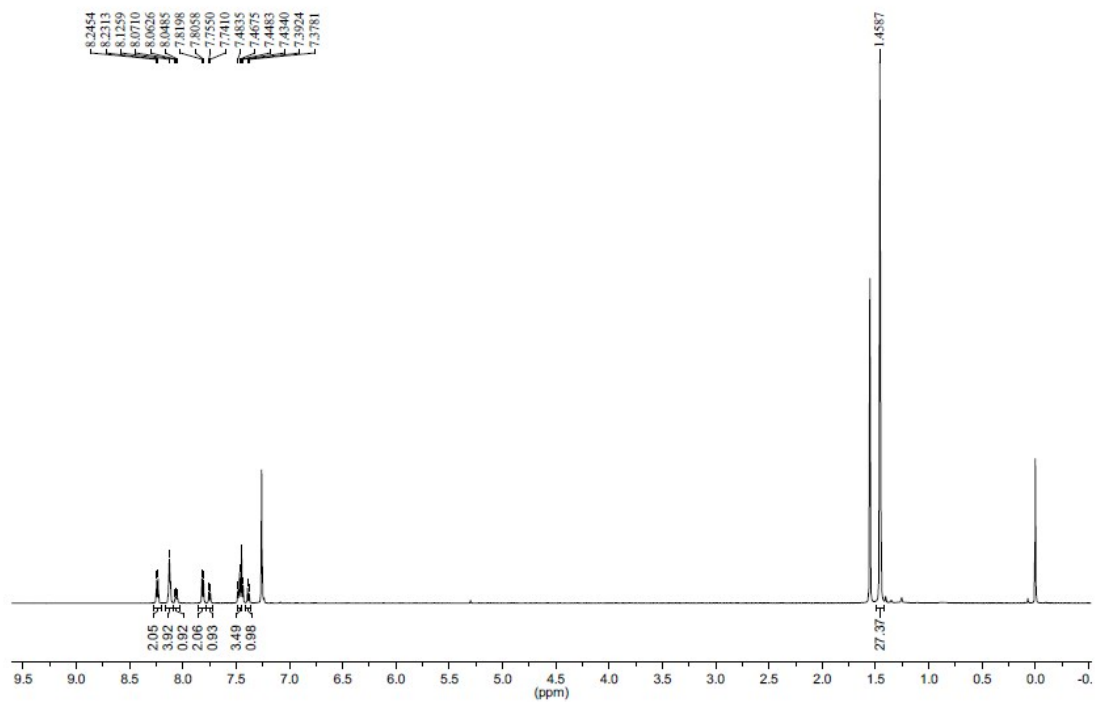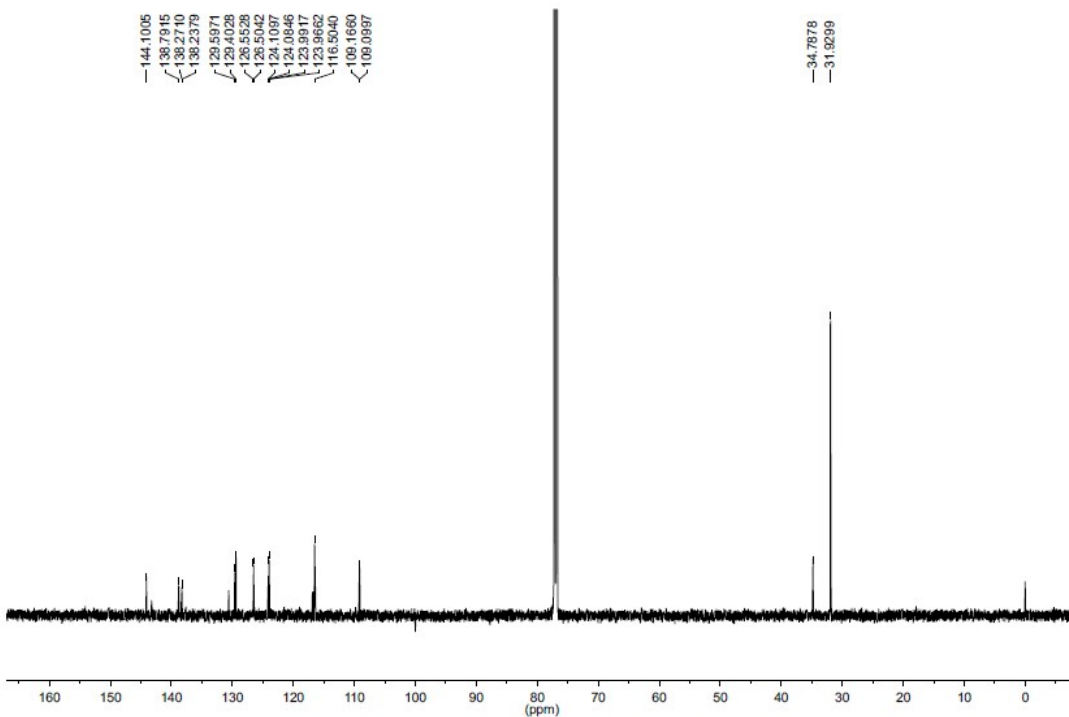



# Compound M1

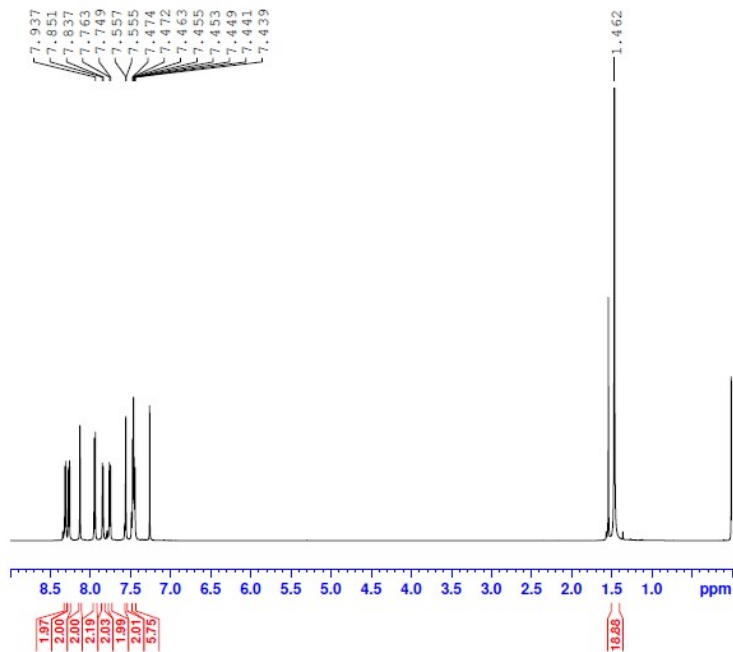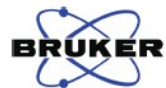

```

Current Data Parameters
NAME      wk148-nmnr
EXPNO    1
PROCNO   1

F2 - Acquisition Parameters
Date_    20181211
Time     12.56 h
INSTRUM  spect
PROBHD   z114607_0208 (
PULPROG  zg30
TD        64902
SOLVENT  CDCl3
NS        8
DS        2
SWH       12019.230 Hz
FIDRES    0.370381 Hz
AQ        2.6999233 sec
RG        137.65
DW        41.600 usec
DE        6.50 usec
TE        303.2 K
D1        2.00000000 sec
TD0       1
SFO1     600.1336008 MHz
NUC1      1H
P1        9.70 usec
PLW1     23.00000000 W

F2 - Processing parameters
SI        65536
SF        600.1300165 MHz
WDW       EM
SSB       0
LB        1.00 Hz
GB        0
PC        1.00
    
```

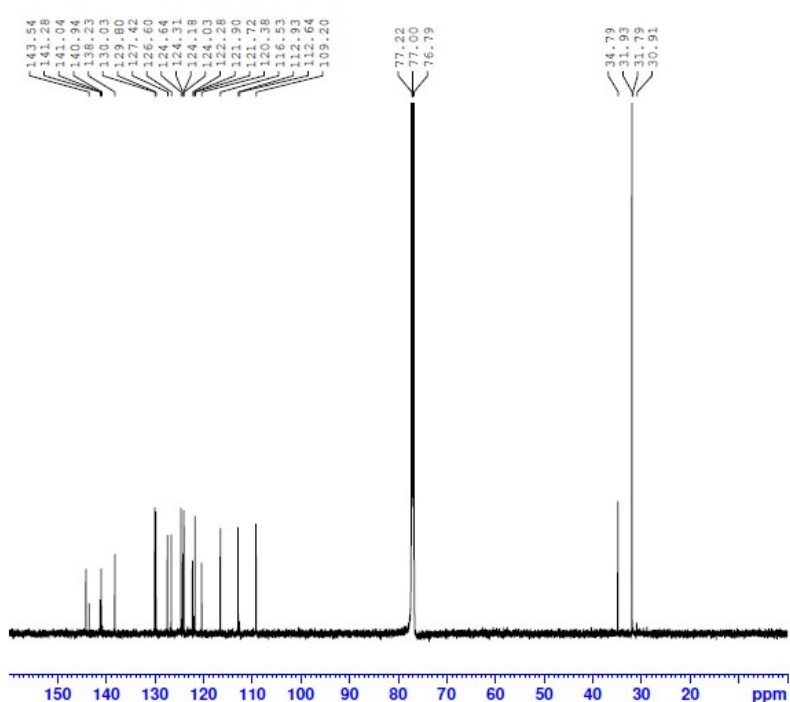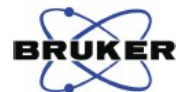

```

Current Data Parameters
NAME      wk148-2-CNMR
EXPNO    1
PROCNO   1

F2 - Acquisition Parameters
Date_    20190525
Time     1.27 h
INSTRUM  spect
PROBHD   z115435_0005 (
PULPROG  zgpg30
TD        65536
SOLVENT  CDCl3
NS        1024
DS        2
SWH       36231.883 Hz
FIDRES    1.105709 Hz
AQ        0.9043968 sec
RG        191.96
DW        13.800 usec
DE        18.00 usec
TE        303.1 K
D1        2.00000000 sec
D11       0.03000000 sec
TD0       1
SFO1     150.9178988 MHz
NUC1      13C
P1        3.67 usec
PLW1     26.00000000 W
SFO2     600.1324005 MHz
NUC2      1H
CPDPRG2  waltz16
PCPD2    70.00 usec
PLW2     19.99900055 W
PLW12    0.36063999 W
PLW13    0.18140000 W

F2 - Processing parameters
SI        32768
SF        150.9028085 MHz
WDW       EM
SSB       0
LB        1.00 Hz
GB        0
PC        1.40
    
```

# PCPSTT1

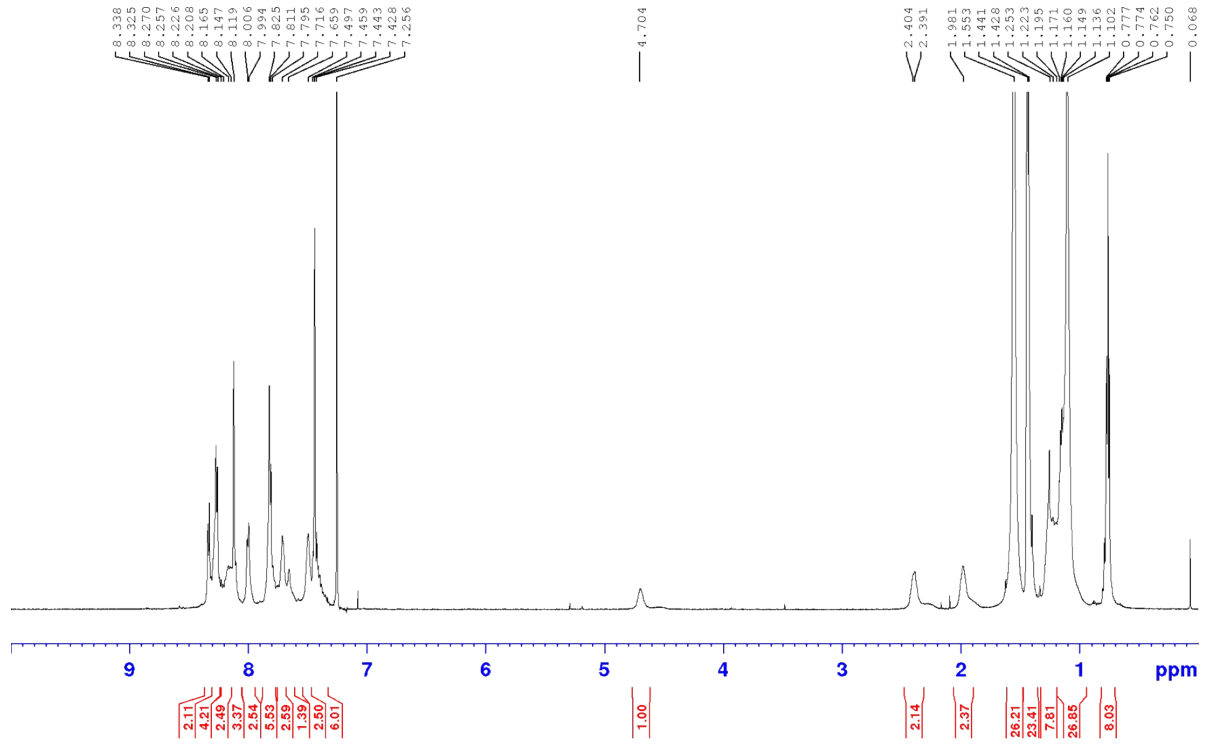

# PCPSTT3

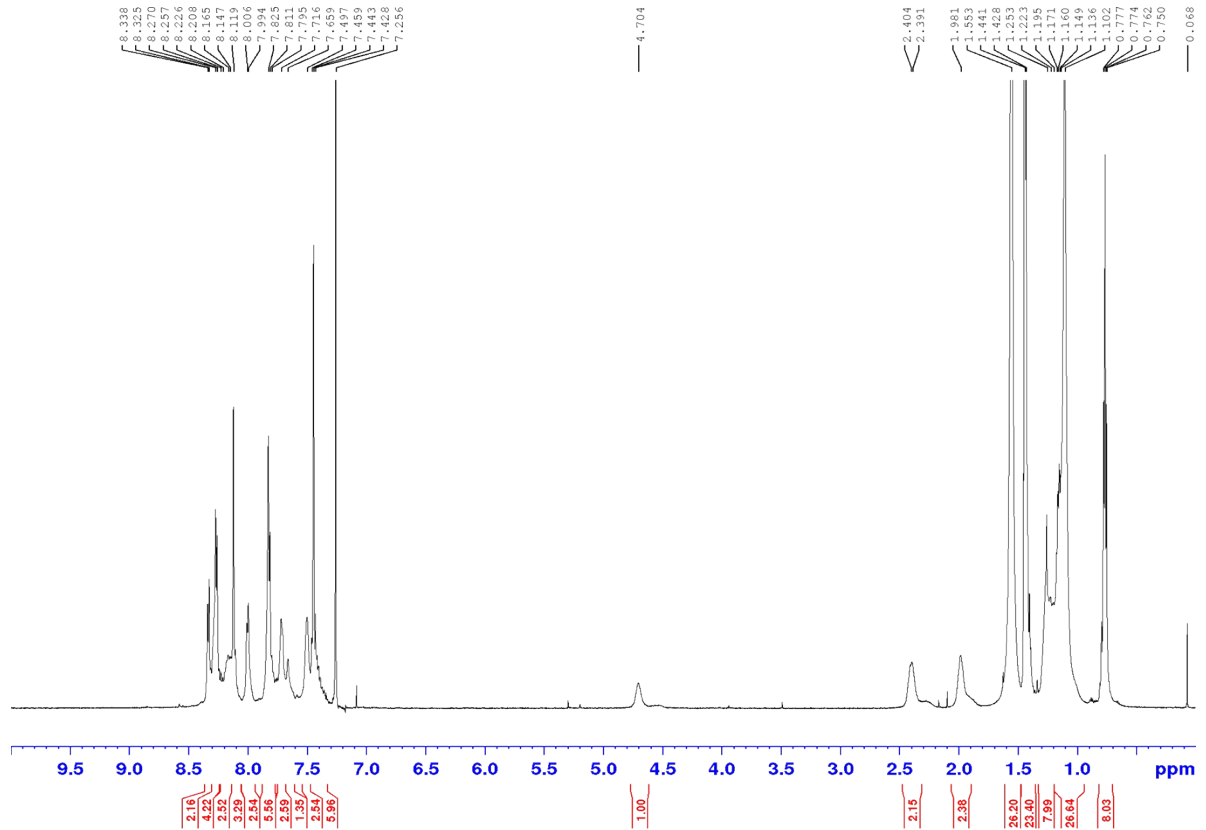

**PCPSTT5**

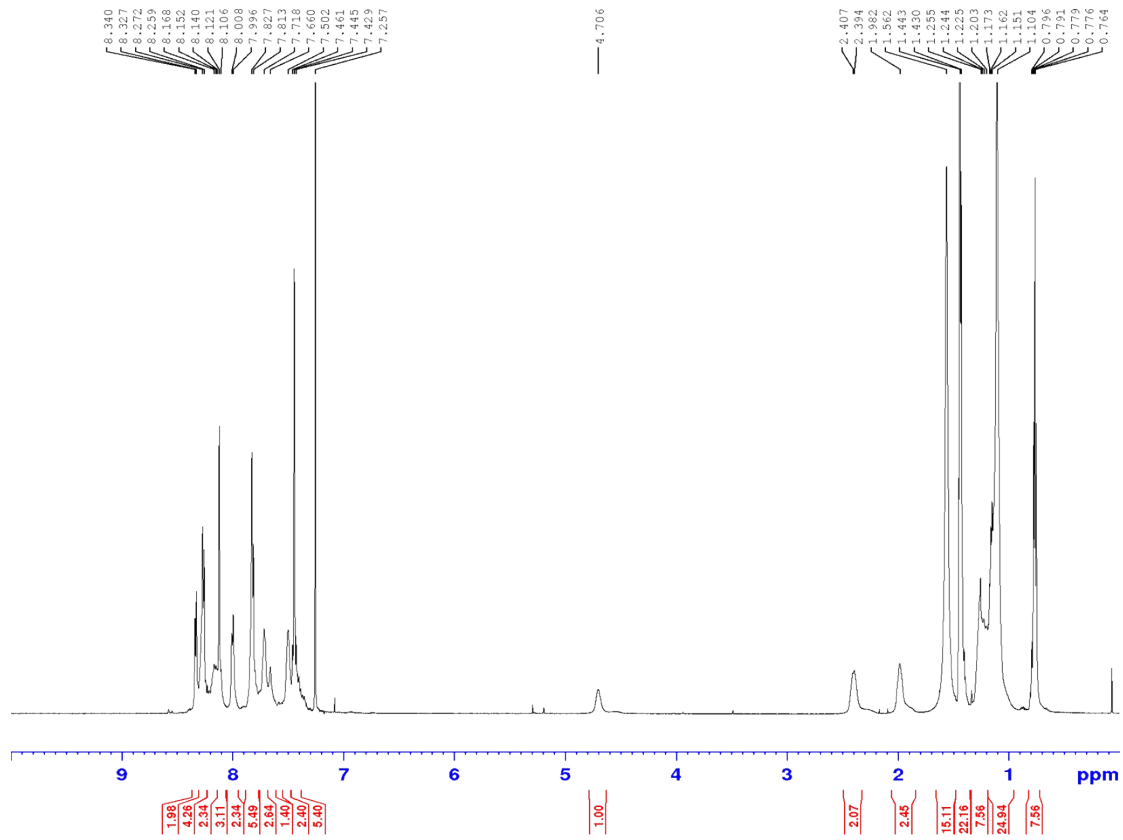

**PCPSTT10**

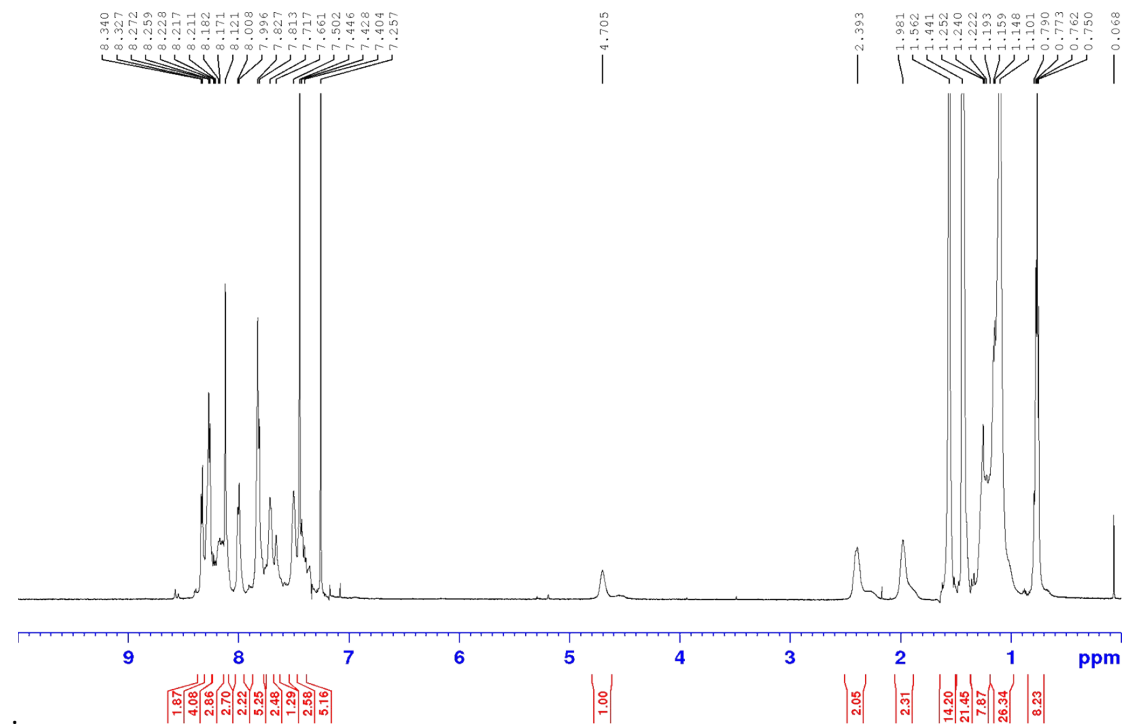

Supplement: d0py01541e1.pdf [file d0py01541e1.pdf]
